# Supplementary figures and images for: Memantine for axial signs in Parkinson's disease: a randomised, double-blind, placebo-controlled pilot study
Source: HighWire-hosted journal article supplement (doi:10.1136/jnnp-2012-303182), 2012-10-16

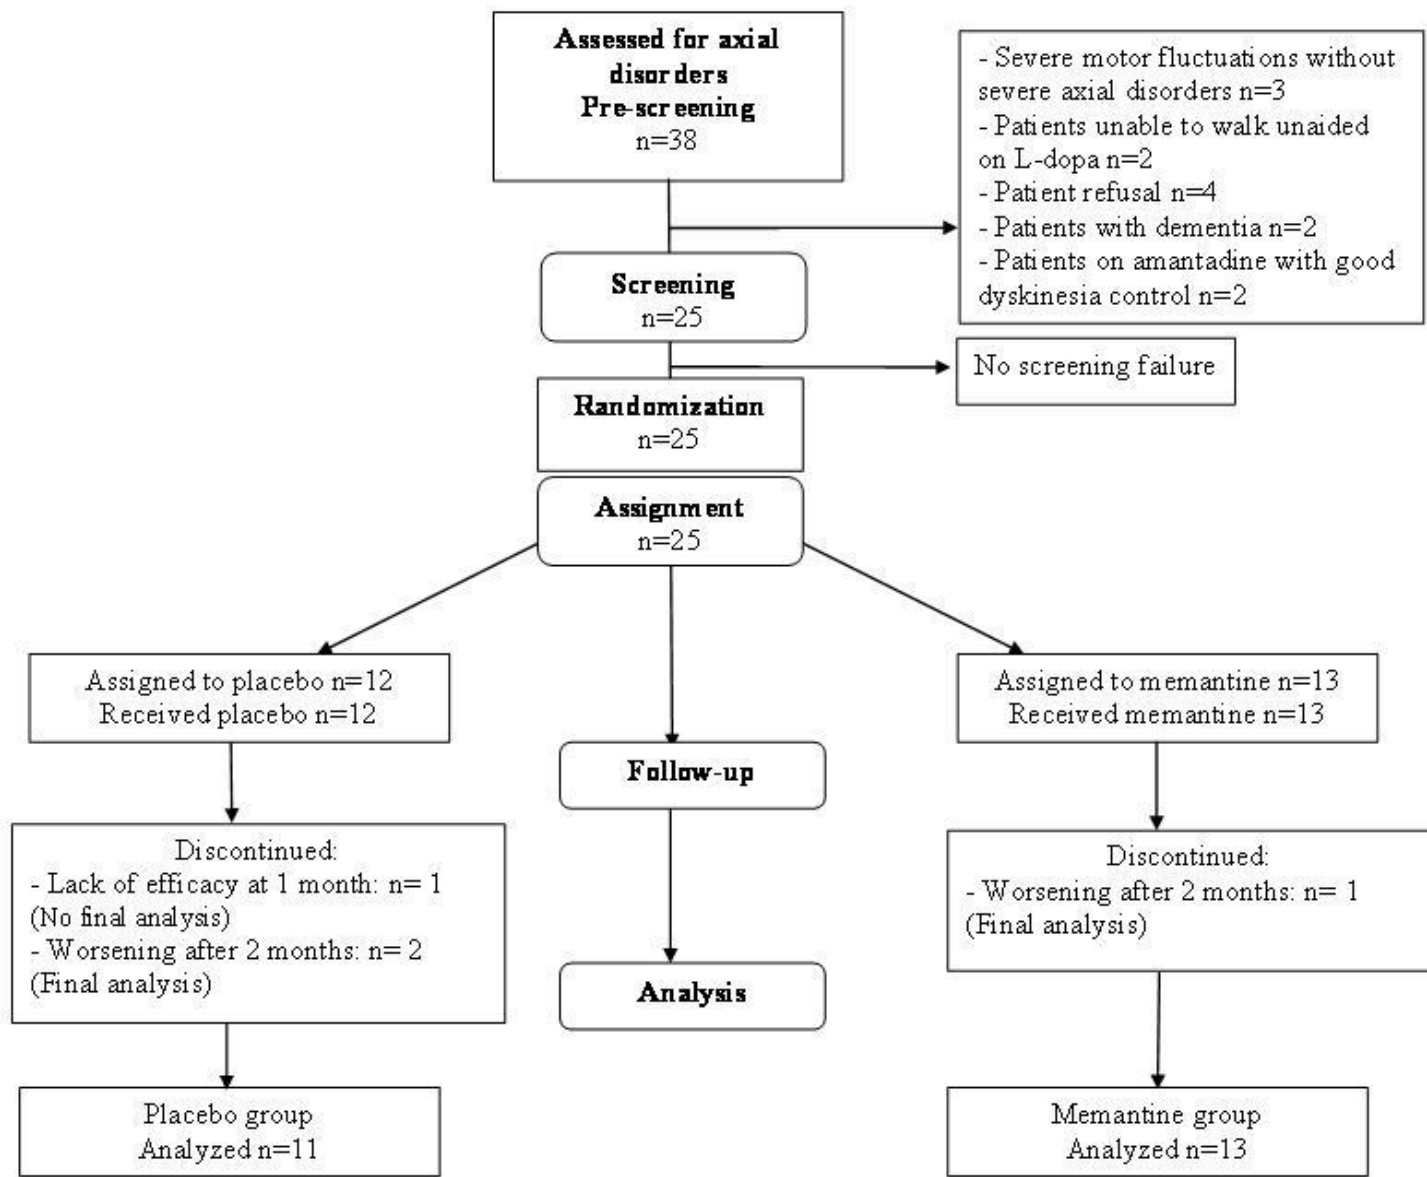

Supplement: jnnp-2012-303182supp_figure.pdf [file jnnp-2012-303182supp_figure.pdf]
